# Supplementary material
Source: publisher site journal article supplement (https://www.dovepress.com/article/318287)
Supplement: Supplementary file 1 [file get_supplementary_file.php]

**Appendix 1: List of all articles (n = 63) included in the critical appraisal.**

1. Ahmadizar F, Vijverberg SJH, Arets HGM, et al. Early life antibiotic use and the risk of asthma and asthma exacerbations in children. *Pediatr Allergy Immunol.* 2017;28(5):430-437.

2. Almqvist C, Wettermark B, Hedlin G et al. Antibiotics and asthma medication in a large register-based cohort study - confounding, cause and effect. *Clin Exp Allergy.* 2012;42(1):104-111.

3. Awasthi S, Kalra E, Roy S et al. Prevalence and risk factors of asthma and wheeze in school-going children in Lucknow, North India. *Indian Pediatr.* 2004;41(12):1205-1210.

4. Celedon JC, Fuhlbrigge A, Rifas-Shiman S et al. Antibiotic use in the first year of life and asthma in early childhood. *Clin Exp Allergy.* 2004;34(7):1011-1016.

5. Celedon JC, Litonjua AA, Ryan L et al. Lack of association between antibiotic use in the first year of life and asthma, allergic rhinitis, or eczema at age 5 years. *Am J Respir Crit Care Med.* 2002;166(1):72-75.

6. Chen IL, Huang HC, Chang YH, et al. Effect of antibiotic use for acute bronchiolitis on new-onset asthma in children. *Sci Rep.* 2018;8(1):6090.

7. Chu S, Yu H, Chen Y et al. Periconceptional and Gestational Exposure to Antibiotics and Childhood Asthma. *PLoS One.* 2015;10(10):e0140443.

8. Cohet C, Cheng S, MacDonald C, et al. Infections, medication use, and the prevalence of symptoms of asthma, rhinitis, and eczema in childhood. *J Epidemiol Community Health.* 2004;58(10):852-857.

9. Cullinan P, Harris J, Mills P, et al. Early prescriptions of antibiotics and the risk of allergic disease in adults: a cohort study. *Thorax.* 2004;59(1):11-15.

10. Del-Rio-Navarro B, Berber A, Blandon-Vijil V, et al. Identification of asthma risk factors in Mexico City in an International Study of Asthma and Allergy in Childhood survey. *Allergy Asthma Proc.* 2006;27(4):325-333.

11. Droste JH, Wieringa MH, Weyler JJ et al. Does the use of antibiotics in early childhood increase the risk of asthma and allergic disease? *Clin Exp Allergy.* 2000;30(11):1547-1553.

12. Farooqi IS, Hopkin JM. Early childhood infection and atopic disorder. *Thorax.* 1998;53(11):927-932.

13. Floistrup H, Swartz J, Bergstrom A, et al. Allergic disease and sensitization in Steiner school children. *J Allergy Clin Immunol.* 2006;117(1):59-66.

14. Foliaki S, Nielsen SK, Bjorksten B, et al. Antibiotic sales and the prevalence of symptoms of asthma, rhinitis, and eczema: The International Study of Asthma and Allergies in Childhood (ISAAC). *Int J Epidemiol.* 2004;33(3):558-563.

15. Foliaki S, Pearce N, Bjorksten B, et al. Antibiotic use in infancy and symptoms of asthma, rhinoconjunctivitis, and eczema in children 6 and 7 years old: International Study of Asthma and Allergies in Childhood Phase III. *J Allergy Clin Immunol.* 2009;124(5):982-989.

16. Goksor E, Alm B, Pettersson R, et al. Early fish introduction and neonatal antibiotics affect the risk of asthma into school age. *Pediatr Allergy Immunol.* 2013;24(4):339-344.

17. Gupta RS, Singh AM, Walkner M, et al. Hygiene factors associated with childhood food allergy and asthma. *Allergy Asthma Proc.* 2016;37(6):e140-e146.

18. Han YY, Forno E, Badellino HA et al. Antibiotic Use in Early Life, Rural Residence, and Allergic Diseases in Argentinean Children. *J Allergy Clin Immunol Pract.* 2017;5(4):1112-1118 e1112.

19. Hoskin-Parr L, Teyhan A, Blocker A et al. Antibiotic exposure in the first two years of life and development of asthma and other allergic diseases by 7.5 yr: a dose-dependent relationship. *Pediatr Allergy Immunol.* 2013;24(8):762-771.

20. Huo X, Chu S, Hua L, et al. The effect of breastfeeding on the risk of asthma in high-risk children: a case-control study in Shanghai, China. *BMC Pregnancy Childbirth.* 2018;18(1):341.

21. Jedrychowski W, Perera F, Maugeri U, et al. Wheezing and asthma may be enhanced by broad spectrum antibiotics used in early childhood. Concept and results of a pharmacoepidemiology study. *J Physiol Pharmacol.* 2011;62(2):189-195.

22. Kashanian M, Mohtashami SS, Bemanian MH et al. Evaluation of the associations between childhood asthma and prenatal and perinatal factors. *Int J Gynaecol Obstet.* 2017;137(3):290-294.

23. Khalkhali HR, Oshnouei S, Salarilak S et al. Effects of antibiotic consumption on children 2-8 years of age developing asthma. *Epidemiol Health.* 2014;36:e2014006.

24. Kim DH, Han K, Kim SW. Effects of Antibiotics on the Development of Asthma and Other Allergic Diseases in Children and Adolescents. *Allergy Asthma Immunol Res.* 2018;10(5):457-465.

25. Korpela K, Salonen A, Virta LJ, et al. Intestinal microbiome is related to lifetime antibiotic use in Finnish pre-school children. *Nat Commun.* 2016;7:10410.

26. Kozyrskyj AL, Ernst P, Becker AB. Increased risk of childhood asthma from antibiotic use in early life. *Chest.* 2007;131(6):1753-1759.

27. Kusel MM, de Klerk N, Holt PG et al. Antibiotic use in the first year of life and risk of atopic disease in early childhood. *Clin Exp Allergy.* 2008;38(12):1921-1928.

28. Kwon JW, Kim BJ, Song Y, et al. Changes in the prevalence of childhood asthma in seoul from 1995 to 2008 and its risk factors. *Allergy Asthma Immunol Res.* 2011;3(1):27-33.

29. Lapin B, Piorkowski J, Ownby D, et al. Relationship between prenatal antibiotic use and asthma in at-risk children. *Ann Allergy Asthma Immunol.* 2015;114(3):203-207.

30. Lee E, Kwon JW, Kim HB, et al. Association Between Antibiotic Exposure, Bronchiolitis, and TLR4 (rs1927911) Polymorphisms in Childhood Asthma. *Allergy Asthma Immunol Res.* 2015;7(2):167-174.

31. Lee SI. Prevalence of childhood asthma in Korea: international study of asthma and allergies in childhood. *Allergy Asthma Immunol Res.* 2010;2(2):61-64.

32. Lee SY, Kwon JW, Seo JH, et al. Prevalence of atopy and allergic diseases in Korean children: associations with a farming environment and rural lifestyle. *Int Arch Allergy Immunol.* 2012;158(2):168-174.

33. Loewen K, Monchka B, Mahmud SM et al. Prenatal antibiotic exposure and childhood asthma: a population-based study. *Eur Respir J.* 2018;52(1).

34. Mai XM, Kull I, Wickman M et al. Antibiotic use in early life and development of allergic diseases: respiratory infection as the explanation. *Clin Exp Allergy.* 2010;40(8):1230-1237.

35. Marra F, Marra CA, Richardson K, et al. Antibiotic use in children is associated with increased risk of asthma. *Pediatrics.* 2009;123(3):1003-1010.

36. Martel MJ, Rey E, Malo JL, et al. Determinants of the incidence of childhood asthma: a two-stage case-control study. *Am J Epidemiol.* 2009;169(2):195-205.

37. McKeever TM, Lewis SA, Smith C, et al. Early exposure to infections and antibiotics and the incidence of allergic disease: a birth cohort study with the West Midlands General Practice Research Database. *J Allergy Clin Immunol.* 2002;109(1):43-50.

38. McKeever TM, Lewis SA, Smith C et al. The importance of prenatal exposures on the development of allergic disease: a birth cohort study using the West Midlands General Practice Database. *Am J Respir Crit Care Med.* 2002;166(6):827-832.

39. Metsala J, Lundqvist A, Virta LJ et al. Prenatal and post-natal exposure to antibiotics and risk of asthma in childhood. *Clin Exp Allergy.* 2015;45(1):137-145.

40. Mitchell EA, Robinson E, Black PN, et al. Risk factors for asthma at 3.5 and 7 years of age. *Clin Exp Allergy.* 2007;37(12):1747-1755.

41. Mitchell EA, Stewart AW, Clayton T, et al. Cross-sectional survey of risk factors for asthma in 6-7-year-old children in New Zealand: International Study of Asthma and Allergy in Childhood Phase Three. *J Paediatr Child Health.* 2009;45(6):375-383.

42. Mitre E, Susi A, Kropp LE et al. Association Between Use of Acid-Suppressive Medications and Antibiotics During Infancy and Allergic Diseases in Early Childhood. *JAMA Pediatr.* 2018;172(6):e180315.

43. Muc M, Padez C, Pinto AM. Exposure to paracetamol and antibiotics in early life and elevated risk of asthma in childhood. *Adv Exp Med Biol.* 2013;788:393-400.

44. Mulder B, Pouwels KB, Schuiling-Veninga CC, et al. Antibiotic use during pregnancy and asthma in preschool children: the influence of confounding. *Clin Exp Allergy.* 2016;46(9):1214-1226.

45. Ortqvist AK, Lundholm C, Kieler H, et al. Antibiotics in fetal and early life and subsequent childhood asthma: nationwide population based study with sibling analysis. *BMJ.* 2014;349:g6979.

46. Pitter G, Ludvigsson JF, Romor P, et al. Antibiotic exposure in the first year of life and later treated asthma, a population based birth cohort study of 143,000 children. *Eur J Epidemiol.* 2016;31(1):85-94.

47. Raciborski F, Tomaszewska A, Komorowski J, et al. The relationship between antibiotic therapy in early childhood and the symptoms of allergy in children aged 6-8 years - the questionnaire study results. *Int J Occup Med Environ Health.* 2012;25(4):470-480.

48. Risnes KR, Belanger K, Murk W et al. Antibiotic exposure by 6 months and asthma and allergy at 6 years: Findings in a cohort of 1,401 US children. *Am J Epidemiol.* 2011;173(3):310-318.

49. Semic-Jusufagic A, Belgrave D, Pickles A, et al. Assessing the association of early life antibiotic prescription with asthma exacerbations, impaired antiviral immunity, and genetic variants in 17q21: a population-based birth cohort study. *Lancet Respir Med.* 2014;2(8):621-630.

50. Sobko T, Schiott J, Ehlin A et al. Neonatal sepsis, antibiotic therapy and later risk of asthma and allergy. *Paediatr Perinat Epidemiol.* 2010;24(1):88-92.

51. Soto-Martinez ME, Yock-Corrales A, Camacho-Badilla K, et al. The current prevalence of asthma, allergic rhinitis, and eczema related symptoms in school-aged children in Costa Rica. *J Asthma.* 2019;56(4):360-368.

52. Stensballe LG, Simonsen J, Jensen SM et al. Use of antibiotics during pregnancy increases the risk of asthma in early childhood. *J Pediatr.* 2013;162(4):832-838 e833.

53. Stokholm J, Sevelsted A, Bonnelykke K et al. Maternal propensity for infections and risk of childhood asthma: a registry-based cohort study. *Lancet Respir Med.* 2014;2(8):631-637.

54. Stromberg Celind F, Wennergren G, Vasileiadou S et al. Antibiotics in the first week of life were associated with atopic asthma at 12 years of age. *Acta Paediatr.* 2018;107(10):1798-1804.

55. Su Y, Rothers J, Stern DA et al. Relation of early antibiotic use to childhood asthma: confounding by indication? *Clin Exp Allergy.* 2010;40(8):1222-1229.

56. von Mutius E, Illi S, Hirsch T et al. Frequency of infections and risk of asthma, atopy and airway hyperresponsiveness in children. *Eur Respir J.* 1999;14(1):4-11.

57. Wang JY, Liu LF, Chen CY et al. Acetaminophen and/or antibiotic use in early life and the development of childhood allergic diseases. *Int J Epidemiol.* 2013;42(4):1087-1099.

58. Wickens K, Ingham T, Epton M, et al. The association of early life exposure to antibiotics and the development of asthma, eczema and atopy in a birth cohort: confounding or causality? *Clin Exp Allergy.* 2008;38(8):1318-1324.

59. Wickens K, Pearce N, Crane J et al. Antibiotic use in early childhood and the development of asthma. *Clin Exp Allergy.* 1999;29(6):766-771.

60. Wu P, Feldman AS, Rosas-Salazar C, et al. Relative Importance and Additive Effects of Maternal and Infant Risk Factors on Childhood Asthma. *PLoS One.* 2016;11(3):e0151705.

61. Yamamoto-Hanada K, Yang L, Narita M et al. Influence of antibiotic use in early childhood on asthma and allergic diseases at age 5. *Ann Allergy Asthma Immunol.* 2017;119(1):54-58.

62. Yeh KW, Ou LS, Yao TC, et al. Prevalence and risk factors for early presentation of asthma among preschool children in Taiwan. *Asian Pac J Allergy Immunol.* 2011;29(2):120-126.

63. Yoshida S, Ide K, Takeuchi M et al. Prenatal and early-life antibiotic use and risk of childhood asthma: A retrospective cohort study. *Pediatr Allergy Immunol.* 2018;29(5):490-495.

**Appendix 2: table with all the extracted information from the reviewed articles.**

| **List of abbreviations  used in the table** | |
| --- | --- |
| AB | Antibiotics/antibiotic |
| BMI | Body mass index |
| COPSAC | The Copenhagen Prospective Studies on Asthma in Childhood |
| DNBC | Danish National Birth Cohort |
| ECRHS | European Community Respiratory Health Survey |
| ETS | Environmental tobacco smoke |
| GP | General practitioner |
| HR | Hazard ratio |
| ICD | International classification of disease |
| ICS | Inhaled corticosteroids |
| ISAAC | International Study on Asthma and Allergies in Childhood |
| KPNC | Kaiser Permanente Northern California |
| LMP | Last menstrual period |
| LRTI | Lower respiratory tract infection |
| MD | Medically diagnosed |
| MMR | Measles mumps rubella |
| NICU | Neonatal intensive care unit |
| NSAIDs | Non-steroidal anti-inflammatory drugs |
| OR | Odds ratio |
| PACMAN | The Pharmacogenetics of Asthma Medication in Children: Medication with Anti-inflammatory Effects |
| RTI | Respiratory tract infection |
| SES | Socio economic status |
| SGA | Small for gestational age |
| SPT | Skin prick test |
| URTI | Upper respiratory tract infection |
| UTI | Urinary tract infection |

**Part 1 of the table with all extracted information from the reviewed articles:**

| **Nr.** | **Journal** | **Year of publication** | **Title of the article** | **Aim of the study** | **Research question or hypothesis of the study** |
| --- | --- | --- | --- | --- | --- |
| 1 | BMC pregnancy and childbirth | 2018 | The effect of breastfeeding on the risk of asthma in high-risk children: a case-control study in Shanghai, China | *“…to investigate the association between AB use in pregnancy and the risk of childhood asthma, and the possible role of breast feeding in modulating the risks...”* | / |
|
| 2 | Allergy, Asthma & Immunology Research | 2018 | Effects of antibiotics on the development of asthma and other allergic diseases in children and adolescents | *“…determine if the duration of exposure to AB in children and adolescents is associated with the later development of allergic disease.”* | / |
| 3 | Journal of asthma | 2018 | The current prevalence of asthma, allergic rhinitis, and eczema related symptoms in school-aged children in Costa Rica | *“…to study the current prevalence 12 years later in an inner-city group of children between 6 and 13 years old.”* | *"Our hypothesis is that similar to other Latin American countries the prevalence of both asthma and allergic rhinitis in Costa Rica has increased."* |
| 4 | European Respiratory Journal | 2018 | Prenatal antibiotic exposure and childhood asthma: a population-based study | *“…examining the association of maternal AB use and childhood asthma...”* | / |
| 5 | Scientific Reports | 2018 | Effect of antibiotic use for acute bronchiolitis on new-onset asthma in children | *“…to assess the relationship of early life AB use for bronchiolitis with new-onset asthma in children.”* | / |
| 6 | JAMA Pediatrics | 2018 | Association between use of acid-suppressive medications and antibiotics during infancy and allergic diseases in early childhood | *“…to evaluate the hypothesis that exposure to either acid-suppressive medications or AB during infancy is associated with an increased risk of childhood allergic disease…”* | *"...exposure to either acid-suppressive medications or AB during infancy is associated with an increased risk of childhood allergic disease…"* |
| 7 | Pediatric Allergy and Immunology | 2018 | Prenatal and early-life antibiotic use and risk of childhood asthma: a retrospective cohort study | *“…evaluate the association between AB exposure in early life and asthma development in childhood considering the types of AB…”* | / |
| 8 | Acta Pediatrica | 2018 | Antibiotics in the first week of life were associated with atopic asthma at 12 years of age | *“…examine the prevalence and risk factors for asthma at 12 years and to examine associations with atopic asthma and non-atopic asthma…to analyze whether the long-term effects of AB during the first week of life could be seen at age 12.”* | / |
| 9 | Annals of Allergy, Asthma, & Immunology | 2017 | Influence of antibiotic use in early childhood on asthma and allergic diseases at age 5 | *“…to elucidate the relation between postnatal AB exposures within the first two years of life and allergic disease in children at 5 years of age...”* | / |
| 10 | Pediatric Allergy & Immunology | 2017 | Early life antibiotic use and the risk of asthma and asthma exacerbations in children | *“…evaluate the effect of early life AB use on the risk of asthma onset later in life in the general population….in the pediatric population with asthma, the association between early life AB use and the risk of asthma exacerbations later in life was studied.”* | / |
| 11 | International Journal of Gynecology and Obstetrics | 2017 | Evaluation of the associations between childhood asthma and prenatal and perinatal factors | *“…to identify prenatal and perinatal risk factors of childhood asthma.”* | / |
| 12 | The Journal of Allergy and Clinical Immunology: In Practice | 2017 | Antibiotic use in early life, rural residence, and allergic diseases in Argentinean children | *“…examine the relation between antibiotics use in early life and current asthma among children aged 6 to 7 years...”* | *"...we hypothesized that antibiotic use would affect the risk of atopic diseases (current wheeze or allergic rhino-conjunctivitis) among children living in urban areas in early life, but not among those living in rural areas in early life…."* |
| 13 | Allergy & Asthma Proceedings | 2016 | Hygiene factors associated with childhood food allergy and asthma | *“…to assess whether hygiene factors are associated with a food allergy and/or asthma diagnosis. We investigated key hygiene factors, including AB use, and their association with food allergy and asthma...”* | / |
| 14 | Clinical & Experimental Allergy | 2016 | Antibiotic use during pregnancy and asthma in preschool children: the influence of confounding | *“…to assess the association between AB use in pregnancy and the development of asthma in preschool children,… evaluate the influence of confounding, …we evaluated the influence of potential time trends in exposure frequencies in the case-sibling analysis.”* | *"We hypothesized that if an effect would be present, that this would be strongest in the third trimester, as antibiotic use during in late pregnancy likely has the strongest influence on the infants’ intestinal flora."* |
| 15 | Plos One | 2016 | Relative importance and additive effects of maternal and infant risk factors on childhood asthma | *“…determine the relative impact and cumulative effect of in utero, perinatal and postnatal exposures that could be measured during pregnancy and infancy on the risk of developing early childhood asthma: maternal AB use/urinary tract infection (UTI), mode of delivery, infant AB use, and having older siblings. We also assessed the dose-dependent relationship of maternal AB use/UTI, infant AB use, and number of older siblings on the risk of developing early childhood asthma”* | / |
| 16 | Nature Communications | 2016 | Intestinal microbiome is related to lifetime antibiotic use in Finnish pre-school children | *“…to investigate the short- and long-term effects of AB on preschool children’s intestinal microbiome and health.”* | / |
| 17 | Plos One | 2015 | Periconceptional and gestational exposure to antibiotics and childhood asthma | *“…to assess the associations between maternal exposure to different types of AB before and during pregnancy and childhood asthma...”* | / |
| 19 | Allergy, Asthma & Immunology Research | 2015 | Association between antibiotic exposure, bronchiolitis, and TLR4 (rs1927911) polymorphisms in childhood asthma | *“…investigate the risk factors involved in the development of asthma during early life and their interactions…., we investigated whether AB exposure in the first year of life and a history of physician diagnosed bronchiolitis in the first 2 years of life were associated with an increased risk of childhood asthma. …, we evaluated whether a polymorphism in TLR4 (rs1927911) modulates the impact of these environmental factors…”* | / |
| 20 | Annals of Allergy, Asthma, & Immunology | 2015 | The relationship between prenatal antibiotic use and asthma in at-risk children | *“…we investigated the effects of prenatal AB use with the subsequent development of asthma by year 3 and wheezing in the third year...”* | / |
| 21 | BMJ | 2014 | Antibiotics in fetal and early life and subsequent childhood asthma: nationwide population based study with sibling analysis. | *“We examined the association between exposure to AB in fetal life or childhood and subsequent development of asthma…”* | / |
| 22 | Epidemiology and Health | 2014 | Effects of antibiotics consumption on children 2-8 years of age developing asthma | *“…the primary objective was to investigate the association between AB exposure and the risk of developing childhood asthma.”* | / |
| 23 | Clinical and Experimental Allergy | 2014 | Prenatal and post-natal exposure to antibiotics and risk of asthma in childhood | *“To assess the association between both prenatal and postnatal exposure to AB and to explore the role of different classes of AB with the risk of asthma in childhood..”* | / |
| 24 | The Lancet Respiratory Medicine | 2014 | Assessing the association of early life antibiotic prescription with asthma exacerbations, impaired antiviral immunity, and genetic variants in 17q21: a population-based birth cohort study | *"… further clarify the complex relation between early life antibiotic use and asthma."…“… explored the association between AB prescription and the development of wheezing, severe asthma exacerbations and atopy during childhood, investigated whether there are differences in antiviral and antibacterial immune responses between children who received AB in infancy compared with those who did not; and explored the association between AB prescription and polymorphisms in chromosomal locus 17q21.”* | *"We postulated that antibiotic prescription in early life is a proxy marker of impaired antiviral immunity and increased susceptibility to recurrent or more severe viral infections, which might, in part, be genetically determined, and that this susceptibility to viral infection (rather than antibiotic prescription or a virus per se) increases the risk for persistence of asthma symptoms and severe asthma exacerbations."* |
| 25 | The Lancet Respiratory Medicine | 2014 | Maternal propensity for infections and risk of childhood asthma: a registry-based cohort study | *“…analysing associations between maternal use of AB and the occurrence of asthma in the offspring in a period from 80 weeks before pregnancy, during pregnancy, and up to 80 weeks post-partum…”* | *"… if maternal antibiotic use was causally associated with asthma in children, the recorded association would be strongest for antibiotic use during, or shortly before, the pregnancy period….* |
|
| 26 | Pediatric Allergy & Immunology | 2013 | Antibiotic exposure in the first two years of life and development of asthma and other allergic diseases by 7.5 yr: a dose-dependent relationship | *“…we evaluated the association between timing and number of courses of infant AB exposure and the development of asthma and allergic diseases…”.* | / |
| 27 | International Journal of Epidemiology | 2013 | Acetaminophen and/or antibiotics use in early life and the development of childhood allergic diseases | *“…we investigated the temporal relationship between the use of acetaminophen and/or AB use during the first year of life and the development of atopic dermatitis, allergic rhinitis and asthma, respectively, in later childhood (2-6 year olds).* | / |
| 28 | Advances in Experimental Medicine and Biology | 2013 | Exposure to paracetamol and antibiotics in early life and elevated risk of asthma in childhood | *“…to examine the association between AB and paracetamol intake in the first year of life and the development of asthmatic symptoms in childhood.”* | / |
| 29 | Pediatric Allergy and Immunology | 2013 | Early fish introduction and neonatal antibiotics affect the risk of asthma into school age | *“…explore the impact of early life events on the risk of asthma at 8 years, with special reference to the early introduction of fish and treatment with AB neonatally….only broad-spectrum AB given during the first week of life were considered.”* | / |
| 30 | International Journal of Occupational Medicine and Environmental Health | 2012 | The relationship between antibiotic therapy in early childhood and the symptoms of allergy in children aged 6-8 years – the questionnaire study results | *“…to assess the relationship between the use of AB in early childhood and the prevalence of allergies, asthma, and their associated symptoms in the urban early-primary-school age group in Poland.”* | / |
| 31 | The Journal of Pediatrics | 2013 | Use of antibiotics during pregnancy increases the risk of asthma in early childhood | *“…We therefore tested the hypothesis that maternal use of AB during pregnancy was associated with increased risk of asthma and eczema during early childhood … we also examined the associations in the subset of mothers using AB for non-respiratory infections.”* | *"...the hypothesis that maternal use of antibiotics during pregnancy was associated with increased risk of asthma and eczema during early childhood…"* |
| 32 | International Archives of Allergy and Immunology | 2012 | Prevalence of atopy and allergic diseases in Korean children: associations with a farming environment and rural lifestyle | *“…to compare the prevalence of allergic diseases and atopic sensitization among Korean schoolchildren in an urban city, a rural town and a rural village. We investigated the association of putative risk and protective factors with allergic diseases and atopic sensitization in these children.”* | *"We hypothesized that the prevalence of allergic diseases and atopic sensitization would be lower among rural children in Korea due to differences in environment and lifestyle."* |
| 33 | Clinical and Experimental Allergy | 2011 | Antibiotics and asthma medication in a large register-based cohort study – confounding, cause and effect | *“…to estimate the association between prescribed AB and asthma medication...” "We also intended to address the issues of reverse causation and confounding by indication…"* | / |
| 34 | Asian Pacific Journal of Allergy and Immunology | 2011 | Prevalence and risk factors for early presentation of asthma among preschool children in Taiwan | *“…to understand current conditions and prevalence of allergic diseases among preschool children and to identify putative causative factors for these allergic symptoms…”* | / |
|
| 35 | Journal of Physiology and Pharmacology | 2011 | Wheezing and asthma may be enhanced by broad spectrum antibiotics used in early childhood. Concept and results of a pharmacoepidemiology study. | *“…to investigate the relationship between different classes of AB treatment in early childhood and the medical diagnosis of asthma or wheezing reported by mothers…”* | *"The primary hypothesis was that broad spectrum antibiotics compared to narrow spectrum may increase the risk for asthma in early childhood."* |
| 36 | Allergy, Asthma, and Immunology Research | 2011 | Changes in the prevalence of childhood asthma in Seoul from 1995 to 2008 and its risk factors | *“We determined the prevalence of wheezing and asthma among elementary school children in 5 areas of Seoul, and compare it to the results reported by the 1995, 2000 and 2005 ISAAC surveys in Korea. …, we compared the prevalence among the aforementioned 5 areas and investigated the risk factors for wheezing and asthma.”* | / |
|
|
| 37 | American Journal of Epidemiology | 2010 | Antibiotic exposure by 6 months and asthma and allergy at 6 years: findings in a cohort of 1401 US children | *“To reduce risk of protophatic bias, we assessed the association of AB use within the first 6 months of life with asthma and allergy at 6 years of age. We considered whether the association differed according to parental history of asthma.”* | *"We hypothesize that early antibiotic use is associated with increased risk of childhood asthma."* |
| 38 | Clinical and Experimental Allergy | 2010 | Antibiotics use in early life and development of allergic diseases: respiratory infection as the explanation | *“…to investigate the relationship between AB-use during the first year of life and the development of allergic disease…”* | / |
| 39 | Clinical and Experimental Allergy | 2010 | Relation of antibiotic use to childhood asthma: confounding by indication? | *“…we examined the association between oral AB use in the first 9 months of life and the development of physician diagnosed asthma, physician diagnosed eczema and allergic allergen sensitization by 5 years of age…”* | / |
| 40 | Allergy, Asthma, and Immunology Research | 2010 | Prevalence of childhood asthma in Korea: international study of Asthma and Allergies in childhood | *“…the prevalence of childhood asthma and its risk factors in Korea are described and compared with those from other countries.”* | / |
| 41 | Paediatric and Perinatal Epidemiology | 2010 | Neonatal sepsis, antibiotic therapy and later risk of asthma and allergy | *“… to investigate the selective contribution of neonatal sepsis and AB therapy on the risk of atopic dermatitis, hay fever and asthma in children and young adults.”* | *"We hypothesised that neonatal sepsis may be associated with a reduced risk of allergic disease in later life."* |
| 42 | Journal of Allergy and Clinical Immunology | 2009 | Antibiotic use in infancy and symptoms of asthma, rhinoconjunctivitis, and eczema in children 6 and 7 years old: International study of asthma and allergies in childhood phase III | *“…to study the associations between parental-reported AB use in the first year of life and current symptoms of asthma, rhinoconjunctivitis, and eczema in children 6 and 7 years old...”* | *"...the hypothesis that antibiotic use may be linked to subsequent risks of asthma, rhinitis, and eczema,…"* |
| 43 | Journal of Pediatrics and Child Health | 2009 | Cross-sectional survey of risk factors for asthma in 6-7 year-old children in New Zealand: International study of asthma and allergies in childhood phase three | *“…to identify and quantify risk factors for asthma in over 10000 6-7-year-old children…”* | / |
| 44 | Pediatrics | 2009 | Antibiotic use in children is associated with increased risk of asthma | *“…explore the association between exposure to AB in the first year of life and the subsequent development of asthma... … to evaluate the association between antibiotics prescribed within the first year of life and the development of asthma...”* | *"The primary hypothesis was to explore the association between antibiotic exposure before 1 year of age and development of childhood asthma."* |
| 45 | Clinical and Experimental Allergy | 2008 | Antibiotic use in the first year of life and risk of atopic disease in early childhood | *“…to investigate the association between AB use in the first year of life and the development of atopic disease at 5 years.”* | / |
| 46 | American Journal of Epidemiology | 2008 | Determinants of the incidence of childhood asthma: a two-stage case-control study | *“… identifying the independent effects of 47 potential predictors, measured during pregnancy and after birth, on the incidence of asthma development in children within the first 10 years of life.”* | / |
| 47 | Clinical and Experimental Allergy | 2008 | The association of early life exposure to antibiotics and the development of asthma, eczema and atopy in a birth cohort: confounding or causality? | *“…to investigate the relationship between AB and the subsequent development of asthma, eczema and atopy... A secondary aim was to determine whether this association is due to confounding by chest infections in infancy.”* | / |
| 48 | Clinical and Experimental Allergy | 2007 | Risk factors for asthma at 3.5 and 7 years of age | *“…to examine risk factors for asthma in children aged 3.5 and 7 years of age, with particular emphasis on environmental exposures in infancy including birth weight, maternal smoking, breast feeding, day care, AB treatment and exposure to inhaled allergens.”* | / |
| 49 | Chest | 2007 | Increased risk of childhood asthma from antibiotics use in early life | *“…examine the association between oral AB use in the first year of life and asthma at age 7 years...”* | *"We hypothesize that lesser contact with dogs during infancy results in a lower microbial load and makes infants more vulnerable to the effects of antibiotics, especially if they are BS cephalosporins."* |
| 50 | Allergy and Asthma Proceedings | 2006 | Identification of asthma risk factors in Mexico City in an International Study of Asthma and Allergy in Childhood survey | *“…performed a risk analysis based on the ISAAC survey in Mexico.”* | / |
| 51 | Journal of Allergy and Clinical Immunology | 2005 | Allergic disease and sensitization in Steiner school children | *“…to identify possible protective factors for allergy associated with the anthroposophic lifestyle..”* | / |
| 52 | Indian Pediatrics | 2004 | Prevalence and risk factors of asthma and wheeze in school-going children in Lucknow, North India | *“…to assess the prevalence of asthma and wheeze and factors associated with it in children aged 6-7 and 13-14 years.* | / |
| 53 | Journal of Epidemiology and Community Health | 2004 | Infections, medication use, and the prevalence of symptoms of asthma, rhinitis, and eczema in childhood | *“We have therefore investigated the association between infections at age 0-4 years, medication use (AB and paracetamol) early in life, and the subsequent risk of childhood asthma at age 6-7 years.”* | / |
| 54 | Clinical & Experimental Allergy | 2004 | Antibiotics use in the first year of life and asthma in early childhood | *“We have examined the association between the use of oral AB in the first year of life and asthma at ages 2 and 5 years…”* | / |
| 55 | International Journal of Epidemiology | 2004 | Antibiotic sales and the prevalence of symptoms of asthma, rhinitis and eczema: the International Study of Asthma and Allergies in Childhood (ISAAC) | *“We have therefore conducted an ecological analysis of the relationship between AB-sales and the prevalence of symptoms of asthma, allergic rhinitis and atopic eczema…”* | / |
| 56 | Thorax | 2004 | Early prescriptions of antibiotics and the risk of allergic disease in adults: a cohort study | *“…to unravel the direction of associations between prescription of AB and allergic disease.”* | / |
| 57 | American Journal of Respiratory and Critical Care Medicine | 2002 | The importance of prenatal exposures on the development of allergic disease | *“…to investigate the relationship between a variety of exposures that alter microbial load during pregnancy, including diagnosis of infections and prescriptions for AB and the incidence of asthma, eczema and hay fever in the child.”* | / |
| 58 | American Journal of Respiratory and Critical Care Medicine | 2002 | Lack of association between antibiotic use in the first year of life and asthma, allergic rhinitis, or eczema at age 5 years. | *“…we examined the association between frequency of use of oral AB in the first year of life and asthma, recurrent wheezing, allergic rhinitis; and eczema at age 5 years among study participants.”* | / |
| 59 | Journal of Allergy and Clinical Immunology | 2002 | Early exposure to infections and antibiotics and the incidence of allergic disease: a birth cohort study with the West Midlands General Practice Research Database | *“…we examined whether exposure to infections –either personal infections or siblings’ infections- protect against the risk of developing allergic disease and whether early exposure to AB increases the subsequent risk of allergic disease..”* | *"Our primary hypothesis was that exposure to infections and antibiotics during the first year of life would affect the subsequent incidence of allergic disease."* |
| 60 | Clinical and Experimental Allergy | 2000 | Does the use of antibiotics in early childhood increase the risk of asthma and allergic disease? | *…”we assessed the association between the use of AB in early childhood and the subsequent development of asthma and allergy in a population-based sample of 7-8 year old schoolchildren.* | / |
| 61 | European Respiratory Journal | 1999 | Frequency of infections and risk of asthma, atopy and airway hyper responsiveness in children | *“…to relate the number of early childhood episodes of fever and AB treatment to the prevalence of asthma, atopy, baseline pulmonary function and airway hyper responsiveness at school age…”* | / |
| 62 | Clinical and Experimental Allergy | 1998 | Antibiotic use in early childhood and the development of asthma | *“… the association between AB use in infancy and the subsequent risk of developing asthma by age 5-10 years has been investigated in children attending Rudolf Steiner schools.”* | *"The primary hypotheses of the study concerned the relationship between antibiotic use, vaccinations and the development of asthma."* |
| 63 | Thorax | 1998 | Early childhood infection and atopic disorder | *“To investigate the putative relationship between childhood infections and atopic disorders further…”* | / |

Italic font indicates text quoted from an article; /: not reported.

**Part 2 of the table with all extracted information from the reviewed articles:**

| **Nr.** | **Do the authors mention "(study) design" in the text (+ location)** | **Case (event or state) definition for asthma** | **Scientific T0 (explicitly/implicitly mentioned + temporal aspects)** | **Measure of disease occurrence (+ abstract temporal aspects)** | **Exposure conceptualization (+ abstract temporal aspect)** | **Operationalization of the exposure** | **Measurement method exposure** | **Measure of association** |
| --- | --- | --- | --- | --- | --- | --- | --- | --- |
| 1 | Yes (methods & discussion) | Childhood asthma | At 6 months of age (referred to as baseline, explicitly) | /   (future incidence) | Maternal AB use in pregnancy   (current exposure) | Dichotomous (Yes/No) | Face-to-face interview | OR |
|
| 2 | Yes (discussion) | Asthma diagnosis | Onset asthma (the day allergic diseases were first diagnosed was set as an index date) or before the last day of 2015 (for controls) (explicitly) | Incidence   (current incidence) | Duration of AB exposure 7 years prior to development of allergic disease   (past exposure) | Annual average AB prescription days (6 categories) | National Health Insurance database | OR |
| 3 | Yes (discussion) | Diagnosis of asthma (wheezing or whistling in the chest in the previous 12 months) | Onset asthma (implicitly) | Prevalence  (current prevalence) | AB use in the first 12 months of life   (past exposure) | Dichotomous (Yes/No) | ISAAC questionnaires at 6-13 years of age | OR |
|
| 4 | Yes (methods) | Child asthma = asthma after the age of 5: any hospitalization for asthma or at least 2 physician diagnoses of asthma (at least 3 months apart and within 1 year) or at least 2 asthma medication prescriptions within 1 year | Birth child (implicitly) | Incidence rate  (future incidence) | Maternal AB use during pregnancy   (current exposure) | Dichotomous (Yes/No) | From database (prescriptions) | HR   Incidence rate |
|
|
| 5 | No | New-onset asthma: ICD 9 criteria AND receipt of selective B2-agonist and/or ICS treatment twice within 1 year (age 2-18) | Asthma onset (implicitly) | /   (current incidence) | AB dosage AB prescriptions (at least one AB in the 5 years before the onset of asthma)   (past exposure) | Cumulative defined daily dose (3 categories)   Dichotomous (Yes/No) | Outpatient prescription database | OR |
| 6 | Yes (abstract) | Asthma: after the age of 6 months (ICD) | At 6 months of age (implicitly) | Incidence   (future incidence) | AB prescription at any time prior to the age of 6 months   (current exposure) | Categorical (cut off 10 days) | Tricare Management Activity Military Health System prescription database | HR |
| 7 | Yes (introduction & methods) | Incidence of asthma: up to age 6 (diagnosis ICD & ICS and controllers use) (at 12-35 months and 36-72 months of age) | At 12 months of age (explicitly) | Incidence   (future incidence) | Prescription of AB to the mother during pregnancy or the child during the first year of birth   (current exposure) | Dichotomous (Yes/No)  Type of AB (4 categories)  Number of AB prescriptions (3 categories) | Large-scale claim database | HR |
|
| 8 | No | ‘Current’ asthma at age 12 years:   Atopic ‘current’ asthma at age 12   Non-atopic ‘current’ asthma at age 12 | 12 years of age/1 year of age (implicitly) | Prevalence   (current prevalence/future prevalence) | AB treatment in the first week of life   (past exposure/current exposure) | Dichotomous (Yes/No) | Questionnaire at 6 months of age | OR |
| 9 | Yes (discussion) | ‘Current’ asthma: (past 12 months) at 5 years of age | At 2 years of age (implicitly) | /   (future prevalence) | History of AB use (antibiotics ever in the first 2 years of life)   (current exposure) | Dichotomous (Yes/No)  Classes of AB (4 categories) | Questionnaire at 2 years of age | OR |
| 10 | Yes (methods & discussion) | Physician diagnosed asthma and asthma exacerbations:  Generation R: ever asthma? Confirmed by doctor? (age 9-10)  Seaton: ever asthma? Confirmed by doctor? (age 10)  Pacman: asthma exacerbations in the past 12 months (age 4-12 years) (emergency department visits, oral corticosteroids)  Breathe: asthma exacerbations in the past 6 months (age 3-19 years) | Generation R: at 1 year of age  Seaton: at 6 months of age  Pacman & Breathe: at 3 years of age  (implicitly) | Prevalence rate  Cumulative incidence rate  (future prevalence) | Antibiotics use (all 4 cohorts)   Timing of AB use (Generation R, Pacman and Breathe)  Number of prescriptions during first 3 years of life (Pacman and Breathe)  Total days of exposure to AB in the first 3 years of life (Pacman and Breathe)   (current exposure) | Dichotomous (exposed vs. never exposed)  Timing first AB use (1st, 2nd, 3rd year of life) (Generation R, Pacman & Breathe)   Number of prescriptions during first 3 years (Pacman & Breathe) (and total days of exposure) | Generation R: parental questionnaire at 1, 2 and 3 years   Seaton: first 6 months parent-reported   Pacman & Breathe: pharmacy data from first year of life | OR |
|
|
|
|
|
|
| 11 | Yes (discussion) | Diagnosis of asthma (age 7-14 years) | Asthma prevalence diagnosis/birth child (implicitly) | /   (current prevalence/future prevalence) | Not specified in methods  In tables: AB during pregnancy  (past exposure/current exposure) | Dichotomous (Yes/No) | Maternal data sheets from hospitals where children were delivered | OR |
| 12 | Yes (methods & discussion) | ‘Current asthma’: parental report of physician diagnosed asthma and current wheeze (in previous year) | 6-7 years of age/at 1 year of age (implicitly) | /   (current prevalence/future prevalence) | Any use of AB in the first year of life   (past exposure/current exposure) | Dichotomous (Yes/No) | Spanish ISAAC questionnaire distributed at school for parents of 6-7 year old children | OR |
| 13 | Yes (introduction) | Asthma: physician diagnosis of asthma (0-21 years) (current) | Inclusion in study (asthma occurrence, implicitly) | Prevalence   (current prevalence) | AB use in the first year of life   (past exposure) | Dichotomous (Yes/No) | Questionnaire at the time of inclusion | Prevalence ratio’s |
| 14 | Yes (introduction, methods, results, discussion & appendix) | Asthma: at least 3 prescriptions for asthma medication within a 12 month period before the 5th birthday | Birth child (implicitly) | /  (current prevalence) | Maternal exposure to AB: at least 1 day supply of systemic AB during pregnancy  (past exposure) | Dichotomous  (Yes/No)  Per trimester of exposure  Per subgroup of AB (5 classes) | Prescription database | OR |
| 15 | No | Childhood asthma: ascertained between 4,5 and 6 years: ICD9 diagnosis or prescriptions for any short-acting β-agonist, 2 prescriptions for montelukast in a 365-day period, or a single prescription of any other asthma-specific medication | Age 1/age 5 (implicitly) | /  (future prevalence/current prevalence) | AB use during infancy (first 12 months)  AB use during pregnancy  (current exposure/past exposure) | Number of courses of AB (9 categories, from 0 to more than 8 doses for AB use in infancy and 6 categories for AB use during pregnancy) | Infant AB use: medical claims prescription fill data  Mothers: Tenn Care insurance | OR |
| 16 | No | Diagnosed asthma: current or developing asthma (age 2-7 years) | Asthma diagnosis/at 2 years of age (implicitly) | /  (current prevalence/future prevalence) | Overall lifetime AB use: macrolide use during the first 2 years of life  (past exposure/current exposure) | Dichotomous (more than 2 courses of macrolides in the first 2 years of life vs. non-exposed) | National database on prescription drug purchase | OR |
| 17 | No | Definite asthma by 7 years of age: medical records | Birth child/7 years of age (implicitly) | Prevalence  (future prevalence/current prevalence) | Maternal AB exposure: AB by oral or injection during 4 weeks prior to last menstrual period or at any month during pregnancy  (current exposure/past exposure) | 6 categories of AB subdivided in 5 categories for timing of exposure (total exposure, 4 week before LMP, 1st trimester, 2nd trimester and 3rd trimester) | Questionnaires during pregnancy | OR |
| 18 | Yes (discussion & introduction) | Treated asthma: at least 2 prescriptions at different time points within a 12 months period, of anti-asthmatic drugs   ‘Current’ asthma at age 6 years or older and at age 13 years or older | At 13 months of age (implicitly) | Incidence rate ratio  (future incidence) | AB exposure during the first 12 months of life: prescription of at least 1 antibiotic  (current exposure) | Dichotomous, AB ever (Yes/No)  Number of courses (4 categories)  Penicillins (Yes/No)  Cephalosporins (Yes/No)  Macrolides (Yes/No)  Other drugs (Yes/No) | Drug prescription records | Incidence rate ratio’s |
|
|
| 19 | No | Prevalence of asthma: ever been diagnosed with asthma | Inclusion in study (implicitly) | Prevalence  (current prevalence) | AB exposure in the first year of life  (past exposure) | Dichotomous (Yes/no) | Modified version of the ISAAC questionnaire | OR |
| 20 | Yes (discussion) | Asthma: Asthma diagnosis by year 3 (ever having asthma) (diagnosis by a physician, parent-reported) | At 1 year of age (implicitly) | Incidence  (future incidence) | Systemic AB us: antibiotic use during pregnancy  (current exposure) | Prenatal AB use: dichotomous (yes/no) (any AB during pregnancy)  Timing of AB use (first trimester vs. second and third trimester) | Questionnaires | OR |
| 21 | Yes (abstract, introduction, methods & discussion) | Asthma: Diagnosis of asthma and 1 or both: at least 2 dispensed asthma drugs with gaps of at least 2 weeks between distributions or at least 3 dispensed asthma drugs or short acting β2-agonists within a year | At 1 year of age (implicitly) | Prevalence   (future prevalence)  Incidence   (future incidence) | Filled prescriptions of systemic antibiotics: any AB, airway AB and urinary tract or skin and soft tissue AB (during pregnancy and in the first year of life)  (current exposure) | Any antibiotics in fetal life: dichotomous (Yes/No)  Per trimester (1,2 and 3)  Idem for airway AB and urinary tract/skin AB | Swedish prescribed drug register | HR |
| 22 | Yes (discussion) | Incident asthmatic patients between age 2-8 years (doctor’s diagnosis) | Asthma onset (implicitly) | Incidence  (current incidence) | History of AB consumption in the first year of life  History of AB consumption during pregnancy  (past exposure) | AB use in the first year of life, dichotomous (Yes/No)  Exposure to AB during pregnancy, dichotomous (Yes/No) | ISAAC questionnaire | OR |
| 23 | No | Diagnosed asthma: received reimbursement for medication for asthma, after 3 years of age  Asthma age 3-5  Asthma age 6 and older (current prevalence) | 6 months prior to asthma occurrence (explicitly) | /  (current prevalence) | Prenatal AB exposure   Postnatal AB exposure (from birth until asthma diagnosis, excluding use 6 months before diagnosis) ( first year of life, during the first 3 years of life)  (past exposure) | Group of AB (7 categories)  Indication of AB (3 categories) | Drug prescription register | OR |
|
| 24 | Yes [methods (under funding) & introduction] | Severe wheeze or asthma exacerbation: receipt of oral corticosteroid for 3 or more days, admission to hospital, or emergency room because of asthma or wheeze needing treatment with oral steroids | First AB prescription (explicitly) | /  (future incidence) | AB prescription: age in days when the child was prescribed the first AB  (current exposure) | Dichotomous (Yes/No)  Age of AB prescription (4 categories) | Medical records | HR |
| 25 | Yes (methods) | Childhood asthma in a 14 year period  1.Recurrent hospital admissions for asthma  2. Long-term outpatient attendance related to asthma  3. Recurrent use of inhaled corticosteroids (collected at pharmacy) | Asthma occurrence (implicitly) | Incidence rate  (current incidence) | AB in pregnancy  AB 80 weeks before pregnancy  AB 80 weeks post-partum  (past exposure) | Dichotomous (Yes/No) for:  Any AB, AB RTI, AB UTI, AB other infection, AB 80-40 weeks before pregnancy, AB 40 weeks before pregnancy to pregnancy, AB pregnancy, AB birth to 40 weeks post-partum, AB 40-80 weeks post-partum | National prescription registry | Incidence rate ratio’s |
| 26 | No | Asthma at age 91 months: maternal report of a physician diagnosis of asthma at any time and symptoms of wheezing in the previous 12 months. | At 2 years of age (implicitly) | /  (future prevalence) | Any AB use during 0-24 months  Total number of times AB had been taken between 0-24 months  Timing of AB intake  (current exposure) | Dichotomous (any vs. none)  Testing dose dependency (5 levels)  Testing time dependency (8 levels) | Questionnaires | OR |
| 27 | Yes (introduction) | Asthma: at least 1 inpatient claim record or 2 ambulatory claims (2-6 years) | At 1 year of age (implicitly) | Incidence rate  (future incidence) | Exposure to acetaminophen and/or AB in the first year of life | Categorical: Non-exposure, only AB, only acetaminophen, both  Number of AB prescriptions first year of life (4 categories)  (current exposure) | Prescription claims data | HR |
| 28 | No | Asthma ever: child ever having an asthma attack  Current asthma: at least 1 wheezing episode in the last 12 months or at least 1 night of cough attack not related to infection | Asthma occurrence (implicitly) | Prevalence  (current prevalence) | AB use in the first year of life (any)  (past exposure) | Dichotomous (Yes/No) | ISAAC questionnaire | OR |
| 29 | No | ‘Current’ doctor diagnosed asthma at 8 years of age: doctor’s diagnosis and either or both ‘current’ asthma medication and current wheezing (last 12 months)  Non-atopic asthma = ‘current’ asthma and not having allergic sensitization, or ‘current’ doctor’s diagnosis of rhino conjunctivitis, food allergy or eczema | At 1 year of age (implicitly) | /  (future prevalence) | Treatment with broad-spectrum AB during the first week of life  (current exposure) | Dichotomous (Yes/No) | Questionnaire at 6 months of age | OR |
| 30 | No | Symptoms of asthma: ever diagnosed with asthma | Asthma occurrence (implicitly) | Prevalence  Incidence  (current prevalence) | Use of AB in the first year of life  Use of AB between 13 and 36 months of age  (past exposure) | In 5 categories (never, 1-2 times, 3-4 times, 5-6 times and more than 6 times) | Questionnaire based on ISAAC and ECRHS II | OR |
| 31 | Yes (abstract, methods & discussion) | COPSAC: acute severe asthma exacerbations (need for oral prednisolone, high-dose ICS or asthma hospitalization) (at least 1 exacerbation in the first 5 years; at least 1 hospitalization in the first 5 years)  DNBC:  Asthma hospitalization  Asthma medication (at least 1 ICS prescription) | Birth child (implicitly) | /  (future incidence) | COPSAC: maternal use of AB in the third trimester of pregnancy  DNBC: maternal use of AB during pregnancy (at least 1 prescription filled during the period defined as date of birth minus gestational age in days)  (current exposure) | Dichotomous (Yes/No) | Questionnaires | HR |
| 32 | No | Asthma diagnosis ever  ‘Current’ asthma | Inclusion at age 9-12 years (implicitly) | Prevalence  (current prevalence) | AB use during infancy  (past exposure) | Dichotomous (Yes/No) | Questionnaire | OR |
| 33 | Yes (introduction, methods & discussion) | Asthma medication: asthma (event): any medication for asthma, except oral β2-agonists, dispensed at least twice | Date of first exposure to antibiotics (explicitly) | Incidence  Incidence rate  (future incidence) | Prescription of AB: at least once between birth and end of follow-up  (current exposure) | Groups of antibiotics (3 categories, with each 4 subgroups) | The prescribed drug register | HR |
| 34 | No | Physician diagnosis of asthma  Asthma-like symptoms: cough without wheeze for at least 3 weeks or wheeze after playing at least 2 different episodes | Asthma occurrence (implicitly) | Prevalence rate  (current prevalence) | AB consumption during the first year of the child’s life  (past exposure) | Dichotomous (Yes/No) | Questionnaire based on ISAAC phase III core and environmental questionnaires | OR |
| 35 | Yes (discussion) | Medical diagnosis of asthma in 5 year olds | 4-5 years of age (implicitly) | Incidence  (current incidence) | Postnatal exposure to various classes of AB  (past exposure) | AB doses per type of AB at 4-5 years of age | Questionnaire | OR |
| 36 | No | Asthma diagnosis ever: the lifetime prevalence of asthma diagnosis   Current asthma: Last 12 months prevalence of asthma treatment  Asthma treatment, last 12 months: prevalence of current asthma (lifetime diagnosis + wheezing 12 months of survey) | Inclusion in study (implicitly) | Prevalence  (current prevalence) | Use of AB during infancy for more than 3 days  (past exposure) | Dichotomous (Yes/No) | Modified ISAAC questionnaire | OR |
| 37 | No | Physician diagnosis of asthma after 6 months of age with history of wheezing in the 6th year of life (current asthma) | At 6 months of age (implicitly) | /  (future prevalence) | AB exposure before 6 months of age  Number of AB courses before 6 months of age  (current exposure) | Dichotomous (Yes/No)  Number of courses (3 categories) | Interview with mother at child’s 6th birthday | OR |
| 38 | Yes (discussion) | Asthma: prevalence of asthma at age 4 and 8 years: more than 3 episodes of wheeze or at least 1 episode of wheeze combined with inhaled glucocorticoids for asthma or asthma symptoms in the previous 12 months | At 6 months of age (implicitly) | Prevalence  (future prevalence) | AB use during the first year of life (ever AB)  (current exposure) | Dichotomous (Yes/No) | Questionnaire at 1 year | OR |
| 39 | Yes (methods) | Ever asthma (active MD asthma): active MD-asthma was reported at least once on questionnaires at age 1, 2, 3 and/or 5 (diagnosed by a physician as having asthma and who were reported to have had active symptoms during the past year ) | At 9 months of age (implicitly) | Prevalence  (future incidence) | Use of systemic AB in the first 9 months of life  (current exposure) | Ever and per year (first 5 years of life) | Nurse interview at 2 weeks, 1 month, 2, 3, 4, 6 and 9 months of age | OR |
| 40 | No | Diagnosis of asthma ever   Treatment of asthma in the last 12 months | Inclusion study (implicitly) | Prevalence  (current prevalence) | Occurrence of AB use during infancy  (past exposure) | / | Questionnaires (written and video) | OR |
| 41 | No | Asthma: prevalence of asthma in children and young adults (7-23 years) | End of the neonatal period (implicitly) | Prevalence  (future prevalence) | AB therapy: in the neonatal period: at least 4 intravenous doses of penicillin and an aminoglycoside in neonatal period without having an infection  (current exposure) | Dichotomous (Yes/No) | Hospital records | OR |
| 42 | No | Severe asthma symptoms:   (‘current’) wheezing causing sleep disturbance, or wheezing limiting speech, or at least 4 attacks of wheezing in the past 12 months  Asthma ever | 6-7 years of age (implicitly) | /  (current prevalence) | AB use in the first year of life  (past exposure) | Dichotomous (Yes/No) | ISAAC questionnaire | Prevalence odds ratio’s |
| 43 | No | Wheeze in the last 12 months (6-7 years, current wheeze) | 6-7 years of age (implicitly) | Prevalence  (current prevalence) | AB in the first year of life  (past exposure) | Dichotomous (Yes/No) | ISAAC questionnaire at 6-7 years | OR |
| 44 | Yes (discussion) | Asthma diagnosis: hospital discharge for asthma or 2 medical fee-for-service claims within a moving 12-months period or 2 prescriptions for a known asthma medication within a moving 12-months period | At 1 year of age (implicitly) | Incidence  (future incidence) | Exposure to AB in the first year of life  (current exposure) | Dichotomous (ever/never)  Number of AB prescriptions (4 levels)  Type of antibiotic dispensed (6 categories) | Administrative health data (database) | HR   Incidence rate asthma |
| 45 | No | ‘Current’ asthma: doctor’s diagnosis of asthma & current wheeze between 4-5 years of age  Atopic ‘current’ asthma: current asthma + positive SPT at 5 years or elevated serum total IgE at 5 years | At 1 year of age (implicitly) | /  (future prevalence) | AB use in the first year of life  (current exposure) | Categorical (AB use 0-6 months, 7-12 months and 1-12 months) | Daily diary | OR |
| 46 | Yes (methods) | Childhood asthma: at least 1 diagnosis of asthma and at least 1 prescription for asthma medication within a 2-year period | First occurrence of an asthma diagnosis (code) and a filled prescription for asthma medication within a 2 year period: refer to this as index date (explicitly) | Incidence  (current incidence) | Mean number of AB prescriptions filled per month during pregnancy  AB in the first 6 months of life or AB prior to index date   (past exposure) | Dichotomous for AB use child (Yes/No)  Not clear how they coded the variable for the mother | From administrative linked health databases | Rate ratio’s   OR |
| 47 | No | ‘Current’ asthma: asthma + wheeze and/or inhaler use occurring in the previous 12 months | Asthma diagnosis period (implicitly) | Prevalence  (current prevalence) | AB use: ever in the first 3 months  AB use: between 3 and 15 months  (past exposure) | 3 categories: systemic AB use, 1 chest infection, 2+ chest infections at 3 months, 15 months and 4 years | Questionnaire at 3 and 15 months of age | OR |
| 48 | Yes (methods & discussion) | ‘Current’ wheeze (past 12 months): asthma at 3.5 and 7 years of age | At 1 year of age   Asthma onset (at 3.5 or 7 years of age) (implicitly) | Prevalence  (future prevalence/current prevalence) | AB in the first year of life  (current exposure/past exposure) | Dichotomous (Yes/No) | Questionnaire at 3.5 years of age | OR |
| 49 | Yes (introduction) | ‘Current’ asthma at age 7: at least 2 physician visits for asthma, 1 asthma hospitalization or 2 prescriptions for any asthma drug in the year following the 7th birthday | At 1 year of age/ At 7 years of age (implicitly) | Prevalence  (future prevalence/current prevalence) | AB use during the first year of life (number of oral AB prescriptions)  (current exposure/past exposure) | Number of oral AB prescriptions (4 categories) | Healthcare administrative data | OR |
| 50 | No | Cumulative prevalence of asthma (wheezing ever)  Current prevalence of asthma (wheezing last 12 months) | 6-7 years of age (implicitly) | Cumulative prevalence  Current prevalence  (current prevalence) | AB use in the first year of life  (past exposure) | Dichotomous (Yes/No) | ISAAC questionnaire at age 6-7 years old | OR |
| 51 | Yes (discussion & methods) | Doctor’s diagnosis of asthma: ever asthma diagnosis | 5-13 years of age/1 year of age (implicitly) | Prevalence  (current prevalence/future prevalence) | Use of AB in the first year of life  (past exposure/current exposure) | Never/first use after 12 months of age and first use first 12 months of age | Parental questionnaire among children age 5-13 years | OR |
| 52 | No | Asthma: 6-7 years and 13-14 years | Inclusion in study 6-7 years and 13-14 years (implicitly) | Prevalence  (current prevalence) | AB use in the first year of life  (past exposure) | / | ISAAC questionnaire at age 6-7 years and 13-14 years | OR |
| 53 | No | Prevalence of asthma symptoms | 6-7 years of age (implicitly) | Prevalence  (current prevalence) | AB use in the first year of life  (past exposure) | Dichotomous (Yes/No) | ISAAC questionnaire (telephone + written) | Prevalence OR |
| 54 | No | Asthma at age 2 (1-2 years)  Asthma at age 5 (2-5 and active 4-5 years) | At 1 year of age (implicitly) | /  (future prevalence) | Number of courses of AB (oral) in the first year of life   (current exposure) | Categorical (number of courses in 4 categories) | Automated pharmacy records (prescriptions dispensed at outpatient pharmacies in the clinical centers) | OR |
| 55 | No | Prevalence of symptoms of asthma: asthma ever | Inclusion in study: 13-14 years of age (implicitly) | Prevalence  (current prevalence) | Total AB-sales: defined daily doses (average daily dose used)  (past exposure?) | Defined daily doses for total AB, broad spectrum AB and narrow spectrum AB | Obtained from Institute for Medical Statistics | Regression coefficient |
| 56 | No | Self-reported (diagnosis) of asthma | At 5 years of age (implicitly) | Prevalence  (future cumulative incidence, prevalence?) | AB prescription first 5 years of life  (current exposure) | Per class of AB (7categories)   Per age of prescription up to 5 years (5 categories )   For both also the total number of prescriptions | General practitioner records | OR |
| 57 | No | Incident diagnosis of asthma | At birth (implicitly) | Incidence  (future incidence) | Prescribed AB during pregnancy  (current exposure) | 4 categories of total number of prescriptions | General practice research database | HR |
| 58 | No | Asthma at age 5: doctor’s diagnosis of asthma + at least 1 episode of wheezing in the previous 12 months | At 1 year of age (implicitly) | /  (future prevalence) | Courses of oral AB in the first year of life  (current exposure) | Categorical (3 categories) | Telephone questionnaire from birth to age 5 | OR |
| 59 | No | Incident diagnoses of asthma: incidence of disease after the age of 1 year | At 6 months of age, at 1 year of age and at 2 years of age? (implicitly) | Incidence  (future incidence) | AB prescriptions in the first year of life  (current exposure) | In classes of AB (5 categories)   Number of prescriptions (6 categories) | Extraction from large longitudinal primary care dataset (information collected as part of routine clinical care) | HR |
| 60 | Yes (methods) | Asthma: ever asthma | At 1 year of age (implicitly) | Prevalence  (future prevalence) | AB in the first year of life  (current exposure) | Dichotomous (Yes/No) | Questionnaire parents when child was 7-8 years old | OR |
| 61 | Yes (methods & discussion) | Asthma: lifetime prevalence (doctor’s diagnosis at least once or more than 1 doctor’s diagnosis of asthmatic, spastic or obstructive bronchitis) | Inclusion in study (implicitly) | Lifetime prevalence  (current prevalence) | AB courses in the first 3 years of life   (past exposure) | Number of AB courses (4 categories) | Retrospective through questionnaires at age 5-7 years and 9-11 years | Prevalence OR |
| 62 | No | History of asthma: (ever asthma) | Inclusion in study at 5-10 years of age (implicitly) | Prevalence  (current prevalence) | AB use:  AB ever   AB use in the first year of life  (past exposure) | Dichotomous (Yes/No)  3 categories (AB use first year/after first year, only/never) | Questionnaire children 5-10 years | Prevalence OR |
| 63 | No | Asthma: recurrent episodes of wheeze after the age of 2 years | At 12 months of age (implicitly) | Cumulative incidence  (future incidence) | Treatment with oral AB in the first 2 years of life  (current exposure) | Dichotomous (Yes/No, when looking for an association with asthma) | Medical records GP | OR |

Italic font indicates text quoted from an article; /: not reported.

**Part 3 of the table with all extracted information from the reviewed articles:**

|  | | **Confounders (+ abstract temporal aspects)** | | **Effect modifiers (+ abstract temporal aspects)** | | **Justification selection confounders and/or effect modifiers** | | **Domain of the study** | | **Design of data collection** | | **Design of data processing** | | **Referral to reporting guideline or theoretical work?** | |
| --- | --- | --- | --- | --- | --- | --- | --- | --- | --- | --- | --- | --- | --- | --- | --- |
| 1 | Maternal age at delivery; maternal education level; child's age; child's gender; gestational age at birth; delivery mode; feeding status first 6 months of life (exclusive breast feeding: yes/no); family history (allergic disorders: yes/no/unknown) | | Child's age; child's gender; feeding status first 6 months of life (exclusive breast feeding: yes/no); family history (allergic disorders: yes/no/unknown) | | Yes: previous publications | | Children 6 months of age | | Case-control study  Hospital-based case-control study  Retrospective study | | Multiple logistic regression | | No | |
| 2 | Age; gender; number of days on which healthcare providers were visited (not specified when); income (insurance premium at onset asthma or before the last day of 2015); place of residence (at onset asthma or before the last day of 2015) | | / | | No | | Children and adolescents | | Cross-sectional study | | Multiple logistic regression | | No | |
| 3 | Complete set of confounders not specified, table 1 and table 3 include possibly a couple of confounders: rhinitis (ever); rhinitis (12 months before onset asthma); ‘rhinoconjuntivitis’ (in the last 12 months); eczema (yes/no, last 12 months); acetaminophen use (yes/no, first 12 months of life); traffic next to house (not specified); family member smoking at home (during the first year of life); wheezing chest after exercise (last 12 months); dry cough at night (last 12 months) | | Complete set of effect modifiers not specified, table 1 and table 3 include possibly a couple of effect modifiers: rhinitis (ever); rhinitis (12 months before onset asthma); ‘rhinoconjuntivitis’ (in the last 12 months); eczema (yes/no, last 12 months); acetaminophen use (yes/no, first 12 months of life); traffic next to house (not specified); family member smoking at home (during the first year of life); wheezing chest after exercise (last 12 months); dry cough at night (last 12 months) | | Explanation on how confounding was checked in statistical analysis section | | Children 6-13 years old | | Cross-sectional study | | Poisson regression   Multivariable analysis | | No | |
| 4 | Residence location (at birth); length of gestation (at birth); number of siblings (at birth); SES (at birth); infant gender; maternal asthma (at birth child); postnatal AB exposure first year of life | | Infant gender; method of birth; newborn feeding method | | No | | Children | | Retrospective cohort study   Population-based cohort study | | Time-to-event analysis  Cox regression | | No | |
| 5 | Urban residence (not specified); allergic rhinitis (not specified); atopic dermatitis (not specified); chronic rhinitis (not specified); age; acute sinusitis (not specified); gastroesophageal reflux (not specified); use of NSAIDs 120 days before asthma onset; gender; subtype of antibiotics (first 2 years of life) | | Age-stratified analysis | | No | | Children with a history of acute bronchiolitis in the first 2 years of life | | Matched case-control study | | Conditional logistic regression | | No | |
| 6 | Prematurity; gender; caesarean delivery; other drug classes (first 6 months of life) | | Any significant first order interaction terms; interaction with time | | Yes: publication on taking into account interaction with time | | Children 6 months of age | | Retrospective cohort analysis  Retrospective cohort study | | Cox proportional hazards regression | | No | |
| 7 | Gender; familial factors (by sibling analysis) | | / | | Yes: referred to studies using the same design to adjust for confounding | | Children 1 year of age | | Retrospective study   Retrospective cohort study | | Cox proportional hazards regression | | No | |
| 8 | Maternal smoking during pregnancy; being born at <37 weeks gestation; any breast feeding for 4 months or longer; parental levels of education; parental asthma; being born small for gestational age; caesarean section; doctors-diagnosis of food allergy (first year of life); parental rhinitis, parental eczema; gender; maternal medication (during pregnancy); recurrent wheeze (first year of life); introduction of egg before 9 months of age; introduction of fish before 9 months of age; fish once a month or more in infancy; damp mould in the home (at 6 months of age); cat at home during infancy | | / | | No | | Children 12 years of age/children 1 year of age | | Prospective birth cohort study  Follow-up study | | Multivariate logistic regression | | No | |
| 9 | Maternal history of allergy; maternal age at pregnancy; maternal smoking during pregnancy; mode of delivery; gestational age at delivery; day-care attendance (during the first 2 years of life); number of previous live births; bronchitis (at 2 years of age); gender | | / | | No | | Children at 2 years of age | | Hospital-based prospective birth cohort study | | Multivariate logistic regression | | No | |
| 10 | Generation R, Pacman and Breathe: age; gender; family history of asthma or allergy  Seaton: gender; family history of asthma or allergy | | Age-stratified analysis | | No, based on available variables in the database | | Children 1 year of age (Generation R)  Children 6 months of age (Seaton)  Children 3 years of age (Pacman and Breathe) | | 2 population based cohorts  2 asthma cohorts | | Multivariable logistic regression  Meta-analysis | | No | |
| 11 | Matched for age and gender; maternal history of asthma; vaginal bleeding during pregnancy; maternal age ≥ 30; exclusive breastfeeding (neonatally) | | / | | No | | Children aged 7-14 years/newborns | | Retrospective case-control study | | Forward logistic regression  Multivariate regression analysis | | No | |
| 12 | Age; gender; parental history of allergy; paracetamol use first year of life; bronchiolitis first year of life; consumption of unpasteurized milk (first year of life) | | Rural residence in the first year of life | | No | | Children aged 6 to 7 years/children 1 year of age | | Cross-sectional study | | Multivariate logistic regression  Multivariable analysis | | No | |
| 13 | Parent reported infections (first year of life); eczema (overall); age; household income (unspecified); number of siblings (current); child care (first 5 years of life); race; sex; pets (first year of life); parental atopy; breast feeding | | / | | No | | Children aged 0-21 years of age | | Cross-sectional family-based study | | Poisson regression model | | No | |
| 14 | Gender; age at delivery; use of acid-suppressive drugs (during pregnancy); use of drugs indicated for allergic dermatitis (during pregnancy); use of drugs indicated for allergic rhinitis (during pregnancy); use of insulin (during pregnancy); potential time trends (in the case-sibling analysis); child birth order; use of asthma medication (during pregnancy); use of antidepressants (during pregnancy) | | / | | Yes: publication | | Preschool children | | Case-sibling study   Nested case-sibling study  Case-sibling analysis  Case-control study   Case-control analysis   Matched case-control design | | Conditional logistic regression | | No | |
| 15 | Maternal smoking during pregnancy; maternal asthma status; maternal age at delivery; maternal educational level; gestational age at delivery; infant’s birth hospitalization length of stay; birth weight; infant’s race; gender; having chronic lung disease (not specified); having congenital heart disease (not specified); type of most severe bronchiolitis healthcare encounters experienced during infancy; birth year; study site | | Subgroup analysis: birth weight, KPNC or Tenn Care | | Yes: covariates chosen a priori based on clinical relevance | | children 1 year of age/children aged 4.5 to 6 years | | Population-based birth cohort study | | Multivariable logistic regression model | | / | |
| 16 | / | | / | | No | | Children aged 2-7 years/children 2 years of age | | Cohort | | Fisher’s test | | No | |
| 17 | Maternal age at delivery; race (mother); number of previous births; smoking during pregnancy; maternal drug allergy history; married at pregnancy; educational level; maternal asthma history | | Stratification by time of medication (not explicitly) | | Yes: previous publication | | Newborns/children up to the age of 7 years | | Prospective cohort study? | | Multilevel multiple logistic regression | | No | |
| 18 | Year of birth; maternal age at birth; gestational age; type of delivery; sex; mother’s formal education; birth weight; RTI requiring hospital admission during the first 12 months of life (confounding by indication) | | / | | No | | Children 1 year of age | | Population-based birth cohort study | | Poisson models | | No | |
| 19 | Age (at inclusion); BMI (at inclusion); household income (at inclusion); parental history of allergic disease; sex; school area; ETS (at inclusion) | | Stratification by genotype TLR4: modifies combined effect of infant AB exposure in the first year of life and history of physician diagnosed bronchiolitis in the first 2 years of life on the development of asthma | | No | | Children | | Cross-sectional study | | Logistic regression | | No | |
| 20 | Study intervention; maternal history of asthma; maternal ethnicity (Mexican ancestry); ibuprofen use during pregnancy; maternal age; smoking during pregnancy; exposure to smoke in the home in the first year of life; child antibiotic use for respiratory reasons; vitamin use of the mother during pregnancy; any ibuprofen use during the child’s first year of life; any respiratory infections during the child’s first year of life | | Vitamin use of the mother during pregnancy; maternal history of asthma; any ibuprofen use of the child in the first year of life; children who did not use AB in the first year of life; respiratory infections in the child’s first year of life; smoking  in the home during the child’s first year of life | | No | | At-risk children 1 year of age | | Cohort   Prospective study | | Multivariable logistic regression | | No | |
| 21 | Maternal smoking during pregnancy, parity (at delivery), family situation, mother’s country of birth, sex, gestational age, respiratory diagnoses as newborn, maternal age at delivery, maternal AB exposure in fetal life, AB exposure defined from hospital diagnoses (unspecified), parental education, maternal asthma, age as analysis time scale, birth weight, mode of delivery | | Interaction birth order and exposure; interaction term parity and age | | Yes: refer to a study adjusting for familial factors by using sibling control analysis | | Children 1 year of age | | Nationwide population-based register study   Nationwide population-based birth cohort | | Cox proportional hazards regression | | No | |
| 22 | Maternal smoking (past); history of asthma or atopic diseases in first- and second-degree relatives; number of older or younger siblings in the household; preterm delivery; duration of breast feeding; delivery method | | Interaction AB consumption and other asthma risk factors not significant | | Yes: referral to previous publications | | Children 2 to 8 years of age | | Case-control study | | Multiple logistic regression | | No | |
| 23 | Previous deliveries; maternal use of antibiotics during pregnancy; maternal asthma; gestational age; total number of AB purchases | | Maternal age; smoking during pregnancy; previous deliveries; mode of delivery; ponderal index child; maternal asthma; previous miscarriages; gestational age; maternal background and perinatal factors; maternal or child’s use of AB | | Yes: referral to own previous publication | | Children | | Population- and register-based study   Population- and register-based nested case-control study | | Conditional logistic regression | | No | |
| 24 | Sex; attendance day-care; older siblings; breast feeding | | Modification of effect of AB by age; interaction AB prescription and atopy | | No | | Children | | Population-based birth cohort   Longitudinal analysis | | Cox models | | No | |
| 25 | Calendar year; age; birth weight; multiple births; maternal age; maternal smoking during pregnancy; maternal asthma; parity; mode of delivery; sex; season of birth; maternal employment | | Stratification by maternal asthma; stratification by treatment indication | | No, but report that they have chosen the confounders a priori and refer to the appendix for more Information | | Children | | Prospective registry-based cohort study | | Log-linear Poisson regression models | | No | |
| 26 | Sex; ethnicity; age of child at outcome; marital status (unspecified); home ownership status (unspecified); mother’s highest educational qualification; degree of difficulty in paying for food (unspecified); mother’s age at time of delivery; birth mode; birth weight; gestation; breast feeding (first year of life); time spent outdoors (child) (unspecified); disinfectant use mother during pregnancy (hygiene); smoking mother during pregnancy; child’s contact with cats (at 24 months) | | Interaction term exposure and sex | | No referral but in text: based on prior reports or theoretical grounds | | Children 2 years of age | | Population-based cohort   Longitudinal cohort   Longitudinal birth cohort | | Logistic regression | | No | |
| 27 | Gender; geographical area at birth; inpatient visits (during the first year of life); bronchitis diagnosis (during the first year of life); enrolee category at birth; number of ambulatory visits (during the first year of life); otitis media diagnosis (during the first year of life) | | / | | No | | Children 2 years of age | | Prospective birth cohorts  Birth cohort | | Cox proportional hazard | | No | |
| 28 | Children’s age; family history of asthma and rhinitis; prematurity; children’s sex | | / | | No | | Children | | Cross-sectional study | | Multinomial logistic regression | | No | |
| 29 | Maternal smoking during pregnancy; any breast feeding for 4 months or more; parental level of education; atopic heredity; gender; maternal medication during pregnancy; gestational age; doctor’s diagnosis of food allergy during the first year of life; eczema during the first year of life; fish at least once per month at 1 year of age; fermented food at least once per month at 1 year of age; choice of spread at 1 year of age; daily outdoor activity at 12 months; father employment at 6 months; rural living at 6 months; caesarean section; small for gestational age; admission to neonatal ward; fish before 9 months of age | | Interaction term: atopic heredity and neonatal AB treatment/ parental asthma and neonatal AB treatment/ early fish introduction and neonatal AB treatment | | No, but explained what confounders they took into account | | Children 1 year of age (not explicitly reported) | | Prospective cohort study | | Multivariate logistic regression | | No | |
| 30 | Sex was a statistically significant factor in all models | | Sex was a statistically significant factor in all models | | No | | Children aged 6-8 years | | Questionnaire study | | Multivariate binary logistic regression | | No | |
| 31 | COPSAC: sex; paracetamol use (during pregnancy); following up to 5 years of age  DNBC: sex; age; siblings; parental asthma; maternal age at delivery; cow’s milk in diet child (unspecified); day care (unspecified); pets (unspecified); maternal income and educational level (unspecified); population density; type of birth; gestational age; birth weight; breast feeding (first year of life); asthma seasonality; maternal eczema and allergic rhinitis; maternal use of tobacco (during pregnancy), alcohol, paracetamol and exercise during pregnancy; paternal education | | COPSAC: /  DNBC: sex; age; interactions sex and age; subgroup analysis by sex and type of AB | | Yes: previous publications | | COPSAC: newborns of mothers with a history of asthma  DNBC: newborns up to the age of 5 years | | COPSAC: clinical birth cohort study   DNBC: cohort study design | | Cox proportional hazards | | No | |
| 32 | Sex; history of atopic dermatitis (mother and father); income (unspecified); age; ETS (unspecified); BMI child | | / | | No, only report that they predefined confounders to adjust for | | Children aged 9-12 years | | Cross-sectional study | | Logistic regression | | No | |
| 33 | Birth month | | Gender; interaction exposure and age | | No | | Children | | Cohort   Population based cohort study  Register-based cohort study | | Cox proportional hazards regression | | No | |
| 34 | / | | / | | No | | Children aged 3-6 years | | Cross-sectional study | | Chi-square test and McNemar’s test | | No | |
| 35 | Number of respiratory episodes (first 5 years of life); child’s gender; prenatal and postnatal (4-5 years of age) ETS; maternal age and education; AB doses; maternal atopy; parity | | Interaction term macrolide use and cephalosporins | | No, but a priori chosen | | Children 5 years of age | | Prospective cohort study   Prospective observational study | | Multivariate logistic regression | | No | |
| 36 | Age; BMI; degree maternal education; sex; parental asthma; second-hand smoking (current) | | / | | No | | Children | | / | | Logistic regression | | No | |
| 37 | Infant’s/child’s race; number in household (at 6 years of age); passive smoking in pregnancy; alcohol exposure in pregnancy; maternal hypertension (during pregnancy); preterm labor; resuscitation at birth; admitted to NICU; length of NICU stay; mechanical ventilation in NICU; neonatal sepsis or bacteremia; neonatal meningitis; breast feeding; history of parental asthma; LRTI during the first year of life; maternal parity; household income (during pregnancy) | | History of parental asthma; LRTIs during the first year of life. | | No, but explained how these were selected (likelihood ratio test) | | Children 6 months of age | | Observational cohort | | Logistic regression | | No | |
| 38 | Sex; older siblings; parental allergy; pneumonia first year; otitis first year; young maternal age; maternal smoking (unspecified); exclusive breast feeding; bronchitis first year | | Interaction AB use and respiratory infections (during the first year of life); subgroup analysis (with and without allergic signs first year of life) | | No | | Children 6 months of age | | Birth cohort study | | Logistic regression | | No | |
| 39 | Confounding by indication (number of visits to physician in the first 9 months of life); gender; feeding status (infant) | | Stratification for AB use; combined variable including AB use and number of illness visits (in the first 9 months of life). | | No | | Children 9 months of age | | Prospective study | | Logistic regression | | No | |
| 40 | / | | / | | No | | Children 6-12 years of age and 12-15 years of age | | Cross-sectional questionnaire-based survey (ISAAC) | | Multiple logistic regression | | No | |
| 41 | Gestational age; parental smoking and level of education (first year of life); sex; number of older siblings; birth weight; mode of delivery; year of birth | | / | | No | | Children | | Prospective cohort study | | Logistic regression | | No | |
| 42 | Sex; language; maternal education; ever breast fed; current diet (at 6-7 years of age); region (not specified); gross national income (not specified); paracetamol use first year of life; parental smoking (not specified); siblings (not specified) | | / | | No | | Children aged 6-7 years | | Cross-sectional study | | Generalized linear mixed models  Multiple regression analysis | | No | |
| 43 | Gender; school decile (at 6-7 years of age); maternal farm animal exposure during pregnancy; born in New Zealand; number of older siblings (at 6-7 years of age); number of younger siblings (at 6-7 years of age); contact farm animals in first year; paracetamol use in first year; current paternal and maternal smoking (at 6-7 years of age); cooking appliance (at 6-7 years of age); television viewing (at 6-7 years of age); ethnicity; maternal education (at 6-7 years of age); breast feeding (first year of life); maternal smoking first year; cat at home in the first year; dog at home in the first year; food intake (at 6-7 years of age); truck passage street (at 6-7 years of age); physical activity (at 6-7 years of age) | | / | | No | | Children aged 6-7 years | | Cross-sectional survey | | Logistic regression | | No | |
| 44 | Gender; SES at birth; urban or rural address at birth; birth weight; gestational age; delivery method; frequency of physician visits (first year of life); allergist/respirologist/immunologist visit (first year of life); hospital visit involving surgery (first year of life); congenital anomalies (first year of life); related diseases (otitis media/bronchitis/URTI and LRTI; first year of life) | | / | | No | | Children 1 year of age | | Longitudinal cohort study  Observational prospective cohort study | | Cox proportional hazard | | No | |
| 45 | Propensity score; number of doctor’s visits; sex; childcare (first year of life); pets (first year of life) | | Number of doctor’s visits (first year of life); sex; childcare (first year of life); pets (first year of life); AB use between 0-6 months | | No | | Children at 1 year of age and at high risk for atopy | | High-risk birth cohort  Prospective birth cohort | | Propensity score adjustment  Logistic regression | | No | |
| 46 | Age at diagnosis; gender; allergic disease prior to index date; administration of oxygen to newborn in hospital; one or more diagnoses of bronchopulmonary disease (prior to index date); maternal receipt of social welfare (in year before or during pregnancy); intranasal corticosteroids during pregnancy; paternal history of asthma; presence of wood-burning fireplace in home (prior to index date); day-care attendance (prior to index date); pets in the home (for more than 2 months) (prior to index date); breast feeding; asthma during pregnancy; asthma siblings (prior to index date) | | / | | No | | Children up to the age of 10 years | | Case-control study, nested in a cohort of children  Two-stage case-control study | | Conditional logistic regression | | No | |
| 47 | Number of chest infections (0-4 years of age); gender; prioritized ethnicity; family history of asthma, eczema/hay fever; AB use during outcome period; household smoking (any by father or mother); ear infection (0-4 years of age); parity (before 3 months of age) | | Number of chest infections (0-4 years of age) | | No | | Children | | Prospective study  Birth cohort study   Cohort | | Cross-sectional associations  Multivariate logistic regression | | No | |
| 48 | Age; smoking (pregnancy); day care or looked after by others (first year of life); presence of dog (first year of life); used pillow (first year of life); used quilt (first year of life); slept on used mattress (first year of life); hospitalized (first year of life); asthma in parents (current); maternal smoking (current); eczema in child (current); rhinitis in child (current); positive skin test in child (current); gender; SGA (at birth); first born (at birth); SES (at birth); damp patches on walls in winter (first year of life); fungus/mould all year (first year of life); presence of cat (first year of life); presence of bird (first year of life); slept on sheepskin (first year of life); children in household (at 1 year); duration of breast feeding (first year of life); carpet in bedroom (first year of life); trucks passing house frequently (7 years of age) | | Interaction with age and significant factors: presence of dog (first year of life); maternal smoking during pregnancy; used quilt (first year of life); slept on used mattress (first year of life); hospitalization (first year of life); parental asthma; eczema in child (current); rhinitis in child (current); positive skin test in child (current); current maternal smoking; day care or looked after by others (first year of life) | | No | | Children 1 year of age/children aged 3.5 and 7 years | | Prospective study | | Generalized linear models  Logistic regression | | No | |
| 49 | Gender; maternal history of asthma; number of health care visits (first year of life); number of non-respiratory tract infections (unspecified); number of siblings (at 7 years of age); urban/rural location (unspecified); number of LRTI (unspecified); household income (unspecified) | | Maternal history of asthma; presence or absence of dog during birth year; urban/rural location (unspecified) | | No | | Children 1 year of age/children 7 years of age | | Longitudinal study  Cohort | | Multivariate logistic regression | | No | |
| 50 | / | | / | | No | | Children (6-7 years of age and 13-14 years of age) | | Cross-sectional survey | | Logistic regression using the forward conditional method | | No | |
| 51 | Age; sex; country; maternal smoking during pregnancy; maternal asthma and/or rhinoconjunctivis; paternal asthma and/or rhinoconjunctivis; having household pets during the first year of life; use of antipyretics during the first year of life; measles infection (not specified); type of diet (not specified); MMR vaccination; current smoking in the household; older siblings; parental education | | / | | Yes: referral to previous results in other publication | | Children aged 5-13 years/children 1 year of age | | Cross-sectional | | Logistic regression | | No | |
| 52 | / | | / | | No | | Children aged 6-7 and 13-14 years old | | Cross-sectional survey   School-based survey   Questionnaire based study | | Multivariate analysis: unconditional logistic regression | | No | |
| 53 | Dataset; sex; family size; paracetamol use (first year of life) | | Stratification for type of infection (first year of life) | | No | | Children aged 6-7 years old | | Asthma prevalence study | | Maentel-Henszel procedure  Logistic regression | | No | |
| 54 | Sex; number of office visits to a health care practitioner (in the first year of life); number of illnesses of the respiratory tract in the first year of life (upper and lower). | | Stratification for eczema (discussion) | | No | | Children 1 year of age | | Longitudinal follow up   Cohort | | Multivariate logistic regression | | No | |
| 55 | Level of westernization or affluence of a country (gross national product) | | / | | No, but report that they correct for the confounders because they have been shown to be associated with asthma | | Schoolchildren aged 13-14 years old | | Ecological analysis | | Linear regression | | No | |
| 56 | Age; sex; parental allergic disease; social class (current, adulthood); number of siblings (current) | | Stratification for age at prescription | | No | | Children 5 years of age | | Retrospective cohort study   Cohort study | | Logistic regression | | No | |
| 57 | Gender; parental allergic disease; general practice; AB first 6 months of life; child’s consulting behaviour in first 6 months of life in quartiles; maternal allergic disease; parental smoking; maternal age; year of birth | | / | | No | | Newborns | | Birth cohort | | Cox regression | | No | |
| 58 | Child’s race; day care attendance first year of life; in utero exposure to smoking; number of months of breast feeding; paternal history of hay fever; maternal hay fever; maternal eczema; average number of cigarettes per day smoked by all adults in the household (unspecified); sex; annual household income (unspecified); paternal history of asthma; paternal history of eczema; maternal asthma; number of older siblings | | / | | Yes: refer to prior published results | | Children 1 year of age | | Prospective birth cohort study | | Logistic regression | | No | |
| 59 | Sex; parental allergic disease; parental smoking (unspecified); consulting behaviour (first year of life); impact of asthma severity variable (in the year following diagnosis of asthma) | | / | | No | | Children 6 months of age/children 1 year of age/children 2 years of age | | Birth cohort study  Cohort | | Cox regression | | No | |
| 60 | Gender; residential area (current); parental asthma; parental hay fever; older siblings; maternal smoking during pregnancy; ETS during first 6 months of life; history of LRTI during first 2 years of life | | Stratification for parental hay fever | | No | | Children 1 year of age | | Cross-sectional | | Multiple logistic regression | | No | |
| 61 | Family history of atopy; parental education; school grade; number of siblings; study area; sex | | Family history of atopy; number of siblings; sex | | No | | Children aged 5-7 years and 9-11 years | | Cross-sectional | | Multivariate logistic regression | | No | |
| 62 | Age; ethnicity; family history of asthma; mother and father’s current smoking; smoking mother and father during child’s first year of life; gender; family size; eczema (ever); hay fever (ever) | | / | | No | | Children 5-10 years of age | | Cross-sectional study  Retrospective study | | Logistic regression | | No | |
| 63 | Year of birth; number of visits to the family doctor (between 0-5 years of age) | | Interactions for model | | No | | Children 1 year of age | | Retrospective study | | Stepwise Logistic regression | | No | |

Italic font indicates text quoted from an article; /: not reported.

**Appendix 3: Critical review of the extracted information – examples**

*Reporting of outcome, exposure and the domain in the aim*

Example 1 refers to an article that reported outcome, exposure and the domain in the aim and example 2 two refers to one that did not. More specifically, example 2 only reported to have studied the prevalence of asthma, while in the text of the article it appeared that they also assessed whether antibiotic use is a risk factor for asthma.

Example 1:

*“…to evaluate the hypothesis that exposure to either acid-suppressive medications or ABX during infancy is associated with an increased risk of childhood allergic disease.”*

Example 2:

*“… to study the current prevalence 12 years later in an inner-city group of children between 6 and 13 years old. Our hypothesis is that similar to other Latin American countries the prevalence of both asthma and allergic rhinitis in Costa Rica has increased.”*

*Reporting of the measure of occurrence*

Forty-five out of 63 articles reported the measure of occurrence (prevalence or incidence of asthma). Example 3 refers to an article that reported the measure of occurrence and example 4 to one that did not. Example 3 refers to the primary outcome being the incidence of disease after the age of 1 year, while example 4 does not refer to the measure of occurrence.

Example 3:

*“…antibiotics during the first year of life would affect the subsequent incidence of allergic disease. …antibiotic prescriptions in the first year of life as the primary exposures and incidence of disease after the age of 1 year as the primary outcome.”*

Example 4:

*“The primary outcome in this analysis was physician-diagnosed asthma after 6 months of age with history of wheezing in the sixth year of life.”*

*Reporting of the case (event or state) definition*

Out of 63 articles, 59 reported a case (event or state) definition. Example 5 refers to an article that reported the case definition and example 6 to one that did not. More specifically, example 5 refers to an article where the asthma case definition was derived from a questionnaire at 5 years of age asking about the previous 12 months. Example 6 refers to an article where the authors did not report on how asthma was assessed and what the case definition for asthma was.

Example 5:

*“Asthma current: A positive answer from the caregiver to the question (child at 5 y old), “Has your child ever been diagnosed by a doctor as having asthma in the past 12 months?”*

Example 6:

*“Neonatal sepsis and antibiotic therapy were considered as exposures and asthma, hay fever and atopic eczema as outcomes.”*

*Reporting of the conceptualization and operationalization of the exposure*

Fifty-seven out of 63 articles reported the conceptualization and operationalization of the exposure. Example 7 refers to an article that reported the conceptualization and the operationalization of the exposure and example 8 to one that did not. More specifically, example 7 refers to ‘any use of antibiotics in the first year of life’, which implies that antibiotic use in the first year of life was operationalized as ‘any use’ vs ‘no use’. Example 8 on the other hand refers to an article where the exposure to antibiotics during pregnancy was only reported in the abstract and in the results tables. In the methods section, the authors only reported that they extracted information necessary for the study without further details.

Example 7:

*“Information on any use of antibiotics in the first year of life, …, was obtained from the core questionnaire, which was supplemented with questions on socio-demographic and household characteristics, history of allergic diseases, and the living environment.”*

Example 8:

*“After obtaining consent from the parents, maternal data sheets on pregnancy and delivery were sourced from the hospitals where the children were delivered, and the information required for the present study was extracted and evaluated.”*

*Temporal relation between outcome and exposure*

For 50 articles, the temporal relation between the outcome and the exposure could be derived from the aim or the case (event or state) definition and conceptualization of the exposure. Example 9 refers to an article where the temporal relation between outcome and exposure could be derived and example 10 refers to one where this temporal relation could not be derived. More specifically, example 9 refers to an article where the authors indicated the temporal relation between the outcome and exposure, ie asthma occurrence was assessed at 12 years of age and exposure to antibiotics was assessed in the first week of life. Example 10 refers to an article where the authors only reported that they investigated the association between antibiotic use and asthma, but they did not specify when exposure and outcome measurement took place in time. As a consequence, the temporal relation could not be derived for example 10.

Example 9:

*“…to examine the prevalence of, and risk factors for, asthma at 12 years of age and to examine the associations with atopic asthma and nonatopic asthma. In particular, we wanted to analyse whether the long-term effects of antibiotics during the first week of life could be seen at the age of 12 years.”*

Example 10:

*“We investigated key hygiene factors, including, antibiotic use, …, and their association with food allergy and asthma in the same cohort of patients in which many showed comorbidity….”*

*Reporting of confounders considered and effect modifiers taken into account*

Regarding confounders and effect modifiers, 56 out of 63 articles reported the confounders that were considered and only 24 out of 63 articles reported to have taken effect modifiers into account. Since no further explanation is necessary, no examples are provided.

*Reporting of the domain of the study*

All articles reported the domain of the study. However, none of the authors explicitly referred to this as the ‘domain’. Example 11 shows how articles implicitly refer to a domain. The domain for this example is children 6-7 years of age.

Example 11:

*“We have therefore investigated the association between infections at age 0-4 years, medication use (antibiotics and paracetamol) early in life, and the subsequent risk of childhood asthma at age 6-7 years.”*

**Appendix 4: Derivation of the ‘theoretical design’ - examples**

*Consensus on ‘theoretical design’ being ‘the current occurrence of asthma as a function of past exposure to antibiotics’:*

Example 12 shows an article where there was consensus from the start about the ‘theoretical design’ being the ‘current occurrence (incidence) of asthma onset as a function of past exposure to antibiotics (maternal antibiotic consumption during pregnancy or child antibiotic consumption in the first year of life) in children 2 to 8 years of age.’ Asthmatic children between the age of 2 and 8 were diagnosed and the exposure to antibiotics during the first year of life was reconstructed. T0 can be considered here to be asthma onset and all confounders adjusted for were either fixed or measured at T0 (maternal smoking history and the number of older or younger siblings).

Example 12:

**Aim of the study:** *“…the primary objective was to investigate the association between antibiotic exposure and the risk of developing childhood asthma.”*

**Measure of occurrence (and abstract temporal aspect):** (current) incidence (*“To recruit incident asthmatic patients, we adopted the Global Initiative for Asthma (GINA) criteria prospectively between March and September 2010.”*)

**Case (event or state) definition:** Incident asthmatic patients(between the age of 2 and 8 years)

**Conceptualization and operationalization of the exposure (and abstract temporal aspect):** History of antibiotic consumption in the first year of life; history of antibiotic consumption during pregnancy (past exposure); (*“…data related to the history of antibiotic consumption in the first year of life and during pregnancy were collected by interviewing the parents/guardians.”*)

**Confounders (and abstract temporal aspects):** Maternal smoking history (measured at T0); history of asthma or atopic diseases in first- and second-degree relatives (fixed); number of older or younger siblings in the household (measured at T0); preterm delivery (fixed); duration of breast feeding (fixed); delivery method (fixed)

**Effect modifiers (and abstract temporal aspects):** Interaction between antibiotic consumption and other asthma risk factors (unspecified)

**Scientific T0:** at asthma onset

**Domain of the study:** Children 2-8 years of age

**Design of data collection: *“****This investigation was a case-control study conducted between March and September 2010 in Urmia, Iran.”*

**Design of data processing:** *“We fitted multiple logistic regression models…”*

*Consensus on the ‘theoretical design’ being the ‘future occurrence of asthma as a function of current exposure to antibiotics’:*

Example 13 shows an article where there was consensus from the start about the ‘theoretical design’ being the ‘future occurrence (incidence) of asthma onset as a function of current exposure to antibiotics (use of systemic antibiotics in the first 9 months of life) in children 9 months of age. A physician-diagnosis of asthma was assessed in children up to the age of 5 years and asthma occurrence was compared among exposed and non-exposed. Exposure was assessed in the first 9 months of life and confounders taken into account were also assessed during the first 9 months of life. T0 was at 9 months of age.

Example 13:

**Aim of the study:** *“…we examined the association between oral antibiotic use in the first 9 months of life and the development of physician-diagnosed asthma, physician-diagnosed eczema, and allergic allergen sensitization by 5 years of age in a non-selected cohort followed prospectively from birth….”*

**Measure of occurrence (and abstract temporal aspect):** (future) prevalence (incidence?); (*“Fisher's exact test was also used to assess relations of early antibiotic use to active asthma, eczema, and specific allergen sensitization at age 1, 2, 3, and 5 years, and to prevalence of ever asthma, eczema, and sensitization by age 5.”*)

**Case (event or state) definition:** ever asthma (= active MD asthma: diagnosed by a physician as having asthma and active symptoms during the past year)

**Conceptualization and operationalization of the exposure (and abstract temporal aspect):** Systemic antibiotic use in the first 9 months of life (current exposure); (*“Children were considered to have used systemic antibiotics in the first 9 months of life if parents reported use of oral antibiotics at any interview.”*)

**Confounders (and abstract temporal aspects):** Confounding by indication (number of visits to physician in the first 9 months of life); gender (fixed); feeding status (infant)

**Effect modifiers (and abstract temporal aspects):** Combined variable including antibiotic use and number of illness visits (in the first 9 months of life).

**Scientific T0:** at 9 months of age

**Domain of the study:** children 9 months of age

**Design of data collection: *“****The Infant Immune Study (IIS) is a prospective birth cohort study of the immunologic and exposure predictors of the development of asthma and allergic disease in childhood.”*

**Design of data processing: “***Fisher's exact test … to assess relations of early antibiotic use to active asthma… and to prevalence of ever asthma,…. The relation of number of courses of antibiotics to ever asthma was assessed by trend chi-square. Odds ratios were calculated using logistic regression ….”*

*No consensus initially on ‘theoretical design’:*

Example 14 shows an article where first there was disagreement about the ‘theoretical design’, but after discussion agreement was reached about the ‘theoretical design’ probably being ‘the future occurrence (cumulative incidence, prevalence?) of asthma onset as a function of current exposure (treatment with oral antibiotics in the first two years of life) in children’. For this example it was not clear which confounders were adjusted for and whether they were measured after or at T0 (at 2 years of age).

Example 14:

**Aim of the study:** *“…investigate the putative relationship between childhood infections and atopic disorders further, we conducted a detailed temporal analysis of family doctor recorded diagnoses of childhood infections, including … diagnoses of asthma, … for a 1975–84 birth group at a single general practice.”*

**Measure of occurrence (and abstract temporal aspect):** (future) cumulative incidence (prevalence?); (*“All subjects were followed up to at least 12 years of age, thereby encompassing the peak incidence of atopic disorders (fig 1).”*)

**Case (event or state) definition:** asthma (recurrent episodes of wheeze after the age of two years)

**Conceptualization and operationalization of the exposure (and abstract temporal aspect):** Treatment with antibiotics in the first two years of life (current exposure); (*“We found no relationship between the number of older siblings and the number of episodes of any infection, nor with antibiotic treatment in the first two years of life (table 2).”*)

**Confounders (and abstract temporal aspects):** year of birth (fixed); number of visits to the family doctor (between 0-5 years of age).

**Effect modifiers (and abstract temporal aspects):** interactions for model (unspecified)

**Scientific T0:** At 2 years of age

**Domain of the study:** children at 2 years of age

**Design of data collection:** *“In this retrospective study three variables significantly predicted subsequent asthma, hay fever and eczema—namely, maternal atopy, immunization with whole-cell pertussis vaccine, and treatment with oral antibiotics in early life.”*

**Design of data processing: “***Stepwise logistic regression analysis was performed incorporating all the medical and social variables studied including social class, year of birth, and number of visits to the family doctor in early childhood (p for inclusion <0.2, p for exclusion > 0.4, to include weak effects).”*
